# Supplementary material
Source: MDPI journal article supplement (https://www.mdpi.com/2311-7524/9/3/410)
Supplement: s1 [file s1]

Table S1: Zinnia growth characteristics.

| Organ                     | Parameter                       | 7 day*        | 14 day        | 21 day        | 28 day        | 35 day        | 40 day         |
|---------------------------|---------------------------------|---------------|---------------|---------------|---------------|---------------|----------------|
| Hypocotyl                 | Length, cm                      | $5.2 \pm 0.2$ | $5.5 \pm 0.2$ | $5.8 \pm 0.3$ | $6.3 \pm 0.5$ | $6.2 \pm 0.4$ | $6.4 \pm 0.5$  |
|                           | % from maximum height on 40 day | 81            | 86            | 91            | 98            | 97            | 100            |
| 1 <sup>st</sup> internode | Length, cm                      | -             | $2.8 \pm 0.2$ | $4.7 \pm 0.4$ | $4.8 \pm 0.3$ | $4.8 \pm 0.2$ | $4.9 \pm 0.5$  |
|                           | % from maximum height on 40 day |               | 57            | 96            | 98            | 98            | 100            |
| 2 <sup>nd</sup> internode | Length, cm                      | -             | -             | $2.6 \pm 0.3$ | $2.9 \pm 0.2$ | $3.0 \pm 0.3$ | $3.15 \pm 0.3$ |
|                           | % from maximum height on 40 day |               |               | 82            | 92            | 95            | 100            |

\* Day from the moment of germination detection.
